# Supplementary material for: Improving Employee Well-Being and Effectiveness: Systematic Review and Meta-Analysis of Web-Based Psychological Interventions Delivered in the Workplace
Source: PubMed Central journal article supplement (PMC5550734; doi:10.2196/jmir.7583), 2017-07-26
Supplement: jmir_v19i7e271_app1.pdf [file jmir_v19i7e271_app1.pdf]

Multimedia Appendix. Selected characteristics of included studies.

| <b>Study</b>                | <b>Population (n)</b>                                          | <b>Control and data analysis</b>                        | <b>Psychological inclusion criteria</b> | <b>Psychological outcome (subscale)<sup>a</sup></b>  | <b>Work outcome (subscale)<sup>a</sup></b> | <b>Study attrition at post intervention</b>             |
|-----------------------------|----------------------------------------------------------------|---------------------------------------------------------|-----------------------------------------|------------------------------------------------------|--------------------------------------------|---------------------------------------------------------|
| Abbott et al, 2009 [56]     | Sales managers from an Australian industrial organization (53) | Wait list control (WLC)<br><br>Intention to treat (ITT) | None                                    | Depression, Anxiety, Stress Scale (DASS-21) (stress) | Volume of product sold (% of target met)   | Intervention=53.8% (14/26)<br><br>Control=29.6% (8/27)  |
| Aikens et al, 2014 [57]     | Employees from a US chemical company (89)                      | WLC<br><br>ITT                                          | None                                    | Perceived Stress Scale (PSS-14)                      | N/A <sup>b</sup>                           | Intervention=18.2% (8/44)<br><br>Control=6.7% (3/45)    |
| Allexandre et al, 2016 [52] | Employees from a US corporate call center (91 <sup>c</sup> )   | WLC<br><br>ITT                                          | None                                    | PSS-10                                               | Productivity                               | Intervention=44.4% (24/54)<br><br>Control=32.4% (12/37) |

| <b>Study</b>               | <b>Population (n)</b>                                                   | <b>Control and data analysis</b>                 | <b>Psychological inclusion criteria</b>                                      | <b>Psychological outcome (subscale)<sup>a</sup></b>       | <b>Work outcome (subscale)<sup>a</sup></b>           | <b>Study attrition at post intervention</b>           |
|----------------------------|-------------------------------------------------------------------------|--------------------------------------------------|------------------------------------------------------------------------------|-----------------------------------------------------------|------------------------------------------------------|-------------------------------------------------------|
| Beauchamp et al, 2005 [62] | Employed care givers of people with dementia in the United States (299) | WLC<br><br>Per protocol                          | None                                                                         | Centre for Epidemiologic Studies-Depression scale (CES-D) | N/A                                                  | Study attrition=6.7% (22/329)                         |
| Billings et al, 2008 [54]  | Employees from US technology company (309)                              | WLC<br><br>Per protocol                          | None                                                                         | Symptoms of distress scale                                | Work Limitations Questionnaire (WLQ; output demands) | Intervention=26.6% (41/154)<br>Control=14.8% (23/155) |
| Birney et al, 2016 [43]    | Employed adults in the United States (300)                              | Active control (links to websites on depression) | Mild to moderate depression (score of 10-19 on Patient Health Questionnaire) | PHQ-9                                                     | Workplace outcome suite (WOS; engagement)            | Intervention=6.7% (10/150)<br>Control=2.7% (4/150)    |

| Study                   | Population (n)                                                         | Control and data analysis                                                 | Psychological inclusion criteria | Psychological outcome (subscale) <sup>a</sup> | Work outcome (subscale) <sup>a</sup> | Study attrition at post intervention                  |
|-------------------------|------------------------------------------------------------------------|---------------------------------------------------------------------------|----------------------------------|-----------------------------------------------|--------------------------------------|-------------------------------------------------------|
|                         |                                                                        | ITT                                                                       | [PHQ-9])                         |                                               |                                      |                                                       |
| Bolier et al, 2014 [49] | Nurses and allied professionals in a hospital in the Netherlands (366) | WLC<br>ITT                                                                | None                             | Brief symptom inventory (BSI; depression)     | Utrecht Work Engagement Scale (UWES) | Intervention=54% (96/178)<br>Control=24.9% (45/188)   |
| Cook et al, 2007 [58]   | Employees for a US human resource (HR) company (419)                   | Active control (given print material on same subject)<br><br>Per protocol | None                             | Perceived stress (5-item scale)               | N/A                                  | Intervention=18.2% (38/209)<br>Control=10.9% (23/210) |
| Ebert et al, 2014       | Teachers in                                                            | WLC                                                                       | Elevated levels                  | Perceived                                     | Teacher self-                        | Intervention=14.7%                                    |

| <b>Study</b>              | <b>Population (n)</b>     | <b>Control and data analysis</b> | <b>Psychological inclusion criteria</b>                                                                                                                                     | <b>Psychological outcome (subscale)<sup>a</sup></b> | <b>Work outcome (subscale)<sup>a</sup></b>                                  | <b>Study attrition at post intervention</b>         |
|---------------------------|---------------------------|----------------------------------|-----------------------------------------------------------------------------------------------------------------------------------------------------------------------------|-----------------------------------------------------|-----------------------------------------------------------------------------|-----------------------------------------------------|
| [46]                      | Germany (150)             | ITT                              | of stress $\geq 16$ on CES-D                                                                                                                                                | Stress Questionnaire (PSQ)                          | efficacy scale                                                              | (11/75)<br>Control=8% (6/75)                        |
| Ebert et al, 2015<br>[47] | Teachers in Germany (128) | WLC<br>ITT                       | Insomnia symptoms $\geq 15$ on Insomnia Severity Index (ISI) and low levels of psychological detachment from work $\geq 15$ on Cognitive Irritation Scale (CIS) subscale of | CES-D                                               | Work related rumination (cognitive irritation subscale of irritation scale) | Intervention=23.4% (15/64)<br>Control=20.3% (13/64) |

| Study                   | Population (n)                                                                       | Control and data analysis | Psychological inclusion criteria              | Psychological outcome (subscale) <sup>a</sup> | Work outcome (subscale) <sup>a</sup> | Study attrition at post intervention               |
|-------------------------|--------------------------------------------------------------------------------------|---------------------------|-----------------------------------------------|-----------------------------------------------|--------------------------------------|----------------------------------------------------|
|                         |                                                                                      |                           | the IS                                        |                                               |                                      |                                                    |
| Ebert et al, 2016 [44]  | General working population in Germany recruited via a health insurance company (264) | WLC<br>ITT                | Elevated levels of stress $\geq 22$ on PSS-10 | PSS-10                                        | UWES                                 | Intervention=9.8% (13/132)<br>Control=1.5% (2/132) |
| Feicht et al, 2013 [59] | Employees from two departments of a German insurance company (147)                   | WLC<br>Per protocol       | None                                          | Stress Warning Signals Scale (SWS)            | N/A                                  | Intervention=15.3% (13/85)<br>Control=8.1% (5/62)  |
| Geraedts et al,         | Employees from                                                                       | Care as usual             | Elevated levels                               | CES-D                                         | World Health                         | Intervention=36.2%                                 |

| <b>Study</b>    | <b>Population (n)</b>                                                                           | <b>Control and data analysis</b> | <b>Psychological inclusion criteria</b>                                                      | <b>Psychological outcome (subscale)<sup>a</sup></b>      | <b>Work outcome (subscale)<sup>a</sup></b>                                                       | <b>Study attrition at post intervention</b>      |
|-----------------|-------------------------------------------------------------------------------------------------|----------------------------------|----------------------------------------------------------------------------------------------|----------------------------------------------------------|--------------------------------------------------------------------------------------------------|--------------------------------------------------|
| 2014 [60]       | six organizations in the Netherlands: 2 banking, 2 research, 1 security, and 1 university (231) | (CAU)<br><br>ITT                 | of depressive symptoms ≥ 16 on CES-D                                                         |                                                          | Organization Health and Work Performance Questionnaire (WHO HPQ-4; 1 item work performance only) | (42/116)<br><br>Control=16.5%<br><br>(19/115)    |
| Grime 2004 [50] | National Health Service (NHS) and local authority employees recruited through                   | CAU<br><br>ITT                   | 10 or more consecutive days off work for stress, anxiety or depression in last 6 months. ≥ 4 | Hospital Anxiety and Depression Scale (HADS; Depression) | N/A                                                                                              | Intervention=20% (5/24)<br><br>Control=0% (0/24) |

| Study                    | Population (n)                                                                       | Control and data analysis                              | Psychological inclusion criteria              | Psychological outcome (subscale) <sup>a</sup> | Work outcome (subscale) <sup>a</sup> | Study attrition at post intervention                   |
|--------------------------|--------------------------------------------------------------------------------------|--------------------------------------------------------|-----------------------------------------------|-----------------------------------------------|--------------------------------------|--------------------------------------------------------|
|                          | a UK NHS occupational health department (48)                                         |                                                        | General Health Questionnaire (GHQ-12)         |                                               |                                      |                                                        |
| Heber et al, 2016 [45]   | General working population in Germany recruited via a health insurance company (264) | WLC<br>ITT                                             | Elevated levels of stress $\geq 22$ on PSS-10 | PSS-10                                        | UWES                                 | Intervention=12.1% (16/132)<br>Control=3.8%(5/132)     |
| Imamura et al, 2014 [55] | Employees at two Japanese information technology (IT) companies (762)                | Active control (email message once a month with stress | None                                          | Beck depression inventory (BDI)               | N/A                                  | Intervention=29.1% (111/381)<br>Control=11.8% (45/381) |

| Study                     | Population (n)                                              | Control and data analysis       | Psychological inclusion criteria | Psychological outcome (subscale) <sup>a</sup> | Work outcome (subscale) <sup>a</sup>                                                              | Study attrition at post intervention            |
|---------------------------|-------------------------------------------------------------|---------------------------------|----------------------------------|-----------------------------------------------|---------------------------------------------------------------------------------------------------|-------------------------------------------------|
|                           |                                                             | management info)                |                                  |                                               |                                                                                                   |                                                 |
|                           |                                                             | ITT                             |                                  |                                               |                                                                                                   |                                                 |
| Ly et al, 2014 [61]       | Middle managers at medium or large employers in Sweden (73) | WLC<br>ITT                      | None                             | PSS-14                                        | Multifactor Leadership Questionnaire (MLQ; transformative leadership subscales, self-report only) | Intervention=8.3% (3/36)<br>Control=(2/37) 5.4% |
| Phillips et al, 2014 [51] | Employees recruited through                                 | Active control (sign posting to | ≥2 on 5 of the 9 items on PHQ-9  | PHQ-9                                         | N/A                                                                                               | Intervention=46.2% (147/318)                    |



| <b>Study</b>             | <b>Population (n)</b>                                                                                | <b>Control and data analysis</b>                       | <b>Psychological inclusion criteria</b>                                       | <b>Psychological outcome (subscale)<sup>a</sup></b> | <b>Work outcome (subscale)<sup>a</sup></b> | <b>Study attrition at post intervention</b>        |
|--------------------------|------------------------------------------------------------------------------------------------------|--------------------------------------------------------|-------------------------------------------------------------------------------|-----------------------------------------------------|--------------------------------------------|----------------------------------------------------|
|                          | the occupational health sections of 3 large UK employers: transport, health, and communication (637) | websites with general info about mental health)<br>ITT | and employee identified that at least one item impacted on work or home life. |                                                     |                                            | Control=41.1% (131/319)                            |
| Ruwaard et al, 2007 [41] | General population in the Netherlands <sup>d</sup> (239)                                             | WLC<br>ITT                                             | None                                                                          | DASS-42 (stress)                                    | N/A                                        | Intervention=15.2% (27/177)<br>Control=1.6% (1/62) |
| Thiart et al, 2015 [48]  | Teachers in Germany (128)                                                                            | WLC                                                    | Clinical insomnia (≥15 on the ISI),                                           | Penn State Worry                                    | Work related rumination                    | Intervention=3.1% (2/64)                           |

| Study                     | Population (n)                                        | Control and data analysis | Psychological inclusion criteria                                                       | Psychological outcome (subscale) <sup>a</sup> | Work outcome (subscale) <sup>a</sup>                           | Study attrition at post intervention              |
|---------------------------|-------------------------------------------------------|---------------------------|----------------------------------------------------------------------------------------|-----------------------------------------------|----------------------------------------------------------------|---------------------------------------------------|
|                           |                                                       | ITT                       | experiencing work related rumination (≥15 on the CIS subscale of the irritation scale) | Questionnaire (PSWQ)                          | (cognitive irritation subscale of irritation scale)            | Control=12.5% (8/64)                              |
| Umanodan et al, 2014 [53] | Employees from a manufacturing company in Japan (263) | WLC<br>ITT                | None                                                                                   | Brief Job Stress Questionnaire (BJSQ)         | Japanese version of the Utrecht Work Engagement Scale (UWES-J) | Intervention=2.8% (4/142)<br>Control=0.8% (1/121) |

<sup>a</sup>Selected outcome used in meta-analysis.

<sup>b</sup>N/A: not applicable; not measured in the study.

<sup>c</sup>Participant number includes only the two arms of this four arm trial that have been included in this review.

<sup>d</sup>The study was aimed at people experiencing work related stress. Seven participants were unemployed because of workplace stress, and 10 participants suffered from stress in unpaid jobs.

### *References*

41. Ruwaard, J., Lange, A., Bouwman, M., Broeksteeg, J., & Schrieken, B. E - Mailed standardized cognitive behavioural treatment of work - related stress: A randomized controlled trial. *Cognitive Behaviour Therapy* 2007; 36(3), 179–192. PMID: 17852171

43. Birney, A. J., Gunn, R., Russell, J. K., & Ary, D. V. MoodHacker Mobile Web App With Email for Adults to Self-Manage Mild-to-Moderate Depression: Randomized Controlled Trial. *JMIR Mhealth and UHealth* 2016; 4(1), e8. PMID: 26813737

44. Ebert, D. D., Heber, E., Berking, M., Riper, H., Cuijpers, P., Funk, B., & Lehr, D. Self-guided internet-based and mobile-based stress management for employees: results of a randomised controlled trial. *Occupational and Environmental Medicine* 2016; 73(5), 315–323. PMID: 26884049

45. Heber, E., Lehr, D., Ebert, D. D., Berking, M., & Riper, H. Web-Based and Mobile Stress Management Intervention for Employees: A Randomized Controlled Trial. *Journal of Medical Internet Research* 2016; 18(1), e21. PMID: 26818683

46. Ebert, D. D., Lehr, D., Boß, L., Riper, H., Cuijpers, P., Andersson, G., et al. Efficacy of an internet-based problem-solving training for teachers: results of a randomized controlled trial. *Scandinavian Journal of Work, Environment & Health*, 40(6) 2014; PMID: 25121986

47. Ebert, D. D., Berking, M., Thiart, H., Riper, H., Laferton, J. A. C., Cuijpers, P., et al. Restoring depleted resources: Efficacy and mechanisms of change of an internet-based unguided recovery training for better sleep and psychological detachment from work. *Health Psychology* 2015; *34 Suppl*, 1240–1251. PMID: 26651465
48. Thiart, H., Lehr, D., Ebert, D. D., Berking, M., & Riper, H. Log in and breathe out: internet-based recovery training for sleepless employees with work-related strain - results of a randomized controlled trial. *Scand J Work Environ Health* 2015; *41(2)*: 164-74  
PMID: 25590336
49. Bolier, L., Ketelaar, S. M., Nieuwenhuijsen, K., Smeets, O., Gärtner, F. R., & Sluiter, J. K. Workplace mental health promotion online to enhance well-being of nurses and allied health professionals: A cluster-randomized controlled trial. *Internet Interventions* 2014; *1(4)*, 196–204. <http://dx.doi.org/10.1016/j.invent.2014.10.002>
50. Grime, P. R. Computerized cognitive behavioural therapy at work: a randomized controlled trial in employees with recent stress related absenteeism. *Occupational Medicine (Lond)* 2004; *54*, 353–359. PMID: 15289593
51. Phillips, R., Schneider, J., Molosankwe, I., Leese, M., Foroushani, P. S., Grime, P., et al. Randomized controlled trial of computerized cognitive behavioural therapy for depressive symptoms: Effectiveness and costs of a workplace intervention. *Psychological Medicine* 2014; *44(4)*, 741–752. PMID: 23795621
52. Allexandre, D., Bernstein, A. M., Walker, E., Hunter, J., Roizen, M. F., & Morledge, T. J. A Web-Based Mindfulness Stress Management Program in a Corporate Call Center: A Randomized Clinical Trial to Evaluate the Added Benefit of Onsite Group Support. *Journal of Occupational and Environmental Medicine* 2016; *58(3)*, 254–264. PMID: 26949875

53. Umanodan, R., Shimazu, A., Minami, M., & Kawakami, N. Effects of computer-based stress management training on psychological well-being and work performance in Japanese employees: a cluster randomized controlled trial. *Industrial Health* 2014; 52(6), 480–491. PMID: 25055847
54. Billings, D. W., Cook, R. F., Hendrickson, A., & Dove, D. C. A web-based approach to managing stress and mood disorders in the workforce. *Journal of Occupational and Environmental* 2008; 50(8), 960–968. PMID: 18695455
55. Imamura, K., Kawakami, N., Furukawa, T. A., Matsuyama, Y., Shimazu, A., Umanodan, R., et al. Effects of an Internet-based cognitive behavioral therapy (iCBT) program in Manga format on improving subthreshold depressive symptoms among healthy workers: a randomized controlled trial. *PLoS ONE* 2014; 9(5), e97167. PMID: 24844530
56. Abbott, J.-A., Klein, B., Hamilton, C., & Rosenthal, A. The Impact of Online Resilience Training for Sales Managers on Wellbeing and Work Performance. *Electronic Journal of Applied Psychology* 2009; 5(1), 89–95.
57. Aikens, K. A., Astin, J., Pelletier, K. R., Levanovich, K., Baase, C. M., Park, Y. Y., & Bodnar, C. M. Mindfulness goes to work: Impact of an online workplace intervention. *Journal of Occupational and Environmental Medicine* 2014; 56(7), 721–731. PMID: 24988100
58. Cook, R. F., Billings, D. W., Hersch, R. K., & Back, A. S. A field test of a web-based workplace health promotion program to improve dietary practices, reduce stress, and increase physical activity: randomized controlled trial. *Journal of Medical Internet Research* 2007; 9(2): e17. PMID: 17581811

59. Feicht, T., Wittmann, M., Jose, G., Mock, A., Hirschhausen, von, E., & Esch, T. (2013). Evaluation of a seven-week web-based happiness training to improve psychological well-being, reduce stress, and enhance mindfulness and flourishing: a randomized controlled occupational health study. *Evidence-Based Complementary and Alternative Medicine* 2013; 676953. PMID: 24489588
60. Geraedts, A. S., Kleiboer, A. M., Wiezer, N. M., van Mechelen, W., & Cuijpers, P. Short-term effects of a web-based guided self-help intervention for employees with depressive symptoms: Randomized controlled trial. *Journal of Medical Internet Research* 2014; 16(5), e121. PMID: 24800966
61. Ly, K. H., Asplund, K., & Andersson, G. Stress management for middle managers via an acceptance and commitment-based smartphone application: A randomized controlled trial. *Internet Interventions* 2014; 95-101  
<http://doi.org/10.1016/j.invent.2014.06.003>
62. Beauchamp, N., Irvine, A. B., Seeley, J., & Johnson, B. Worksite based internet multimedia program for family caregivers of persons with dementia. *The Gerontologist* 2005; 45(6), 793–801. PMID: 16326661

*Source*

This is a Multimedia Appendix to a full manuscript published in the J Med Internet Res, for full copyright and citation information see <http://dx.doi.org/10.2196/jmir.7583>
