# Supplementary material for: Improving Employee Well-Being and Effectiveness: Systematic Review and Meta-Analysis of Web-Based Psychological Interventions Delivered in the Workplace
Source: PubMed Central journal article supplement (PMC5550734; doi:10.2196/jmir.7583), 2017-07-26
Supplement: jmir_v19i7e271_app2.pdf [file jmir_v19i7e271_app2.pdf]

Multimedia Appendix. Selected characteristics of included interventions.

| <b>Study</b>            | <b>Intervention description</b>                                                                                   | <b>Type<sup>a</sup></b> | <b>Primary modality (secondary modalities)</b>              | <b>Persuasive tech</b>                                                                                                 | <b>Guidance</b>                                               | <b>Length</b> | <b>Adherence<sup>b</sup></b>                |
|-------------------------|-------------------------------------------------------------------------------------------------------------------|-------------------------|-------------------------------------------------------------|------------------------------------------------------------------------------------------------------------------------|---------------------------------------------------------------|---------------|---------------------------------------------|
| Abbott et al, 2009 [56] | <i>ResilienceOnline</i><br>Enhancing 7 core skills of resilience. Delivered via video and slides.                 | Cognitive therapy       | Website (telephone, conference call, and emails)            | <i>Self-monitoring</i><br>using a questionnaire to measure resilience                                                  | Yes— member of staff (offer of telephone and conference call) | 10 weeks      | 27% (7/26) completed the whole program      |
| Aikens et al, 2014 [57] | <i>Mindfulness Goes to Work</i><br>Mindfulness delivered via virtual and in-person classes and Web-based training | Mindfulness             | Website (email, texting, workbook, webinar, in person mtgs) | <i>Self- monitoring</i><br>using a weekly progress tracking survey. <i>Tailoring</i><br>using preprogramed emails as a | Yes— MBSR instructor                                          | 7 weeks       | 63.6% (28/44) completed ≥75% of the program |

| Study                      | Intervention description                                                                             | Type <sup>a</sup>       | Primary modality (secondary modalities) | Persuasive tech                                                           | Guidance | Length    | Adherence <sup>b</sup>                         |
|----------------------------|------------------------------------------------------------------------------------------------------|-------------------------|-----------------------------------------|---------------------------------------------------------------------------|----------|-----------|------------------------------------------------|
|                            |                                                                                                      |                         |                                         | response to the survey. Opt in text messages that correspond to progress. |          |           |                                                |
| Alexandre et al, 2016 [52] | <i>Stress Free Now</i><br>Web-based, interactive educational program based on mindfulness meditation | Mindfulness             | Website (email, compact discs [CDs])    | Non described                                                             | No       | 8 weeks   | 7.4% (4/54) accessed website ≥4 out of 8 weeks |
| Beauchamp et al, 2005      | <i>Care Giver's Friend: Dealing with</i>                                                             | Stress and coping model | Website (email)                         | <i>Tailoring</i> via a questionnaire that                                 | No       | 4.3 weeks | 10.6% (16/150)                                 |

| Study                     | Intervention description                                                                                           | Type <sup>a</sup>                  | Primary modality (secondary modalities) | Persuasive tech                                     | Guidance | Length   | Adherence <sup>b</sup>                                  |
|---------------------------|--------------------------------------------------------------------------------------------------------------------|------------------------------------|-----------------------------------------|-----------------------------------------------------|----------|----------|---------------------------------------------------------|
| [62]                      | <i>Dementia</i><br>Multimedia intervention with text material and videos that model positive caregiving strategies |                                    |                                         | produces links tailored to the individual           |          |          | visited ≥4 times (19% (29/150) visited ≥2)              |
| Billings et al, 2008 [54] | <i>Stress and Mood Management</i><br>Modular, multi media program. Audio narrated with video and graphics.         | Cognitive behavioral therapy (CBT) | Website                                 | Tailoring through an embedded assessment instrument | No       | 13 weeks | 3.2% (5/154) accessed stress management module ≥4 times |
| Birney et al,             | <i>MoodHacker.</i>                                                                                                 | CBT and                            | Mobile                                  | <i>Tunneling</i> through                            | No       | 6        | On average                                              |

| Study                   | Intervention description                                                                        | Type <sup>a</sup>   | Primary modality (secondary modalities) | Persuasive tech                                                                           | Guidance | Length   | Adherence <sup>b</sup>                                         |
|-------------------------|-------------------------------------------------------------------------------------------------|---------------------|-----------------------------------------|-------------------------------------------------------------------------------------------|----------|----------|----------------------------------------------------------------|
| 2016 [43]               | Sequenced content delivered through in-app messaging, articles, and videos.                     | positive psychology | phone app (emails)                      | sequenced content.<br><i>Self-monitoring</i> of mood and activities                       |          | weeks    | participants logged in 16 times (standard deviation [SD] 13.3) |
| Bolier et al, 2014 [49] | Based on personal screening, participants offered access to a number of Web-based interventions | CBT                 | Website (email)                         | <i>Tailoring</i> through automated personalized feedback and signposting to interventions | No       | 13 weeks | 5.1% (9/178) started ≥1 module                                 |
| Cook et al, 2007 [58]   | <i>Health connection.</i> Multimedia, health                                                    | Social cognitive    | Website                                 | Non described                                                                             | No       | 13 weeks | 15.4% (32/209)                                                 |

| Study                  | Intervention description                                                                                         | Type <sup>a</sup>                                              | Primary modality (secondary modalities) | Persuasive tech                                                                                                        | Guidance | Length  | Adherence <sup>b</sup>                   |
|------------------------|------------------------------------------------------------------------------------------------------------------|----------------------------------------------------------------|-----------------------------------------|------------------------------------------------------------------------------------------------------------------------|----------|---------|------------------------------------------|
|                        | promotion for the workplace designed to improve dietary practices, reduce stress, and increase physical activity | theory                                                         |                                         |                                                                                                                        |          |         | accessed the stress management module >2 |
| Ebert et al, 2015 [47] | <i>GET.ON Recovery</i> 6 sessions including articles, exercises, testimonies, audio, and video                   | Cognitive-behavioral and metacognitive techniques for insomnia | Website                                 | <i>Tailoring</i> through content being modified depending on response options. Self- monitoring through recovery diary | No       | 6 weeks | 48.4% (31/64) completed all sessions     |

| Study                   | Intervention description                                                                                                                         | Type <sup>a</sup>                                                        | Primary modality (secondary modalities) | Persuasive tech                                                                                                                         | Guidance | Length  | Adherence <sup>b</sup>             |
|-------------------------|--------------------------------------------------------------------------------------------------------------------------------------------------|--------------------------------------------------------------------------|-----------------------------------------|-----------------------------------------------------------------------------------------------------------------------------------------|----------|---------|------------------------------------|
| Ebert et al, 2016 [44]  | <i>GET.ON Stress</i> 7 sessions (plus optional booster session and 8 optional modules) including text, exercises, testimonials, audio, and video | Transactional model of stress. Problem solving and emotional regulation. | Website (text messages)                 | <i>Tailoring</i> through optional modules and content being modified depending on response option. Self-monitoring through stress diary | No       | 7 weeks | 42% (55/131) completed session 7/7 |
| Feicht et al, 2013 [59] | Happiness training focusing on exercises to achieve a positive psychological state                                                               | Positive psychology                                                      | Website (emails)                        | Non described                                                                                                                           | No       | 7 weeks | N/A <sup>9</sup>                   |

| Study                     | Intervention description                                                                                                        | Type <sup>a</sup>                     | Primary modality (secondary modalities) | Persuasive tech                                                                                                                                                          | Guidance                            | Length  | Adherence <sup>b</sup>               |
|---------------------------|---------------------------------------------------------------------------------------------------------------------------------|---------------------------------------|-----------------------------------------|--------------------------------------------------------------------------------------------------------------------------------------------------------------------------|-------------------------------------|---------|--------------------------------------|
| Geraedts et al, 2014 [60] | <i>Happy@Work</i> . 6 weekly sessions including information, examples, and assignments. Weekly assignments submitted to a coach | Cognitive therapy and problem solving | Website (emails)                        | <i>Tunneling</i> participants unable to start new session until they receive feedback on previous session. <i>Tailoring</i> through individualized feedback from a coach | Yes—coach (feedback on assignments) | 6 weeks | 26.7% (32/116) completed 6/6 lessons |
| Grime 2004 [50]           | <i>Beating the Blues</i> . Interactive CBT program                                                                              | CBT                                   | Standalone computer                     | <i>Tunneling</i> , you complete one module before                                                                                                                        | No                                  | 8 weeks | 66.7% (16/24) completed 8/8 sessions |

| Study                    | Intervention description                                                                                                 | Type <sup>a</sup>             | Primary modality (secondary modalities) | Persuasive tech                                                           | Guidance                         | Length  | Adherence <sup>b</sup>                |
|--------------------------|--------------------------------------------------------------------------------------------------------------------------|-------------------------------|-----------------------------------------|---------------------------------------------------------------------------|----------------------------------|---------|---------------------------------------|
|                          |                                                                                                                          |                               |                                         | starting another<br>Self-monitoring<br>through weekly<br>progress reports |                                  |         |                                       |
| Heber et al, 2016 [45]   | <i>GET.ON Stress</i><br>Seven sessions (plus optional booster session) including psycho-education, interactive exercises | Transactional model of stress | Website (emails, text messages)         | <i>Tailoring</i> through personalized feedback                            | Yes—coach (feedback on sessions) | 7 weeks | 70.5% (93/132) completed 7/7 sessions |
| Imamura et al, 2014 [55] | <i>Internet CBT Program: Useful</i>                                                                                      | CBT                           | Website (emails)                        | <i>Tailoring</i> through personalized                                     | Yes—clinical psychologist        | 6 weeks | 64.8% (247/381)                       |



| Study               | Intervention description                                                                                                       | Type <sup>a</sup>                       | Primary modality (secondary modalities) | Persuasive tech                                               | Guidance                               | Length  | Adherence <sup>b</sup>                              |
|---------------------|--------------------------------------------------------------------------------------------------------------------------------|-----------------------------------------|-----------------------------------------|---------------------------------------------------------------|----------------------------------------|---------|-----------------------------------------------------|
|                     | <i>mental health solutions series for business</i><br>Internet CBT using Manga (Japanese comic) story delivered over 6 lessons |                                         |                                         | feedback                                                      | (feedback on assignments)              |         | completed 6/6 sessions                              |
| Ly et al, 2014 [61] | Mobile phone stress management intervention, 6 modules, each module has a short audio lecture, plus information and            | Acceptance and commitment therapy (ACT) | Mobile phone app (text messages)        | <i>Self-monitoring</i> through personal statistics on the app | Yes— therapist (one way text messages) | 6 weeks | 44.4% (16/36) adhered to intervention for 6/6 weeks |

| Study                     | Intervention description                                                                                           | Type <sup>a</sup> | Primary modality (secondary modalities) | Persuasive tech                                 | Guidance                                  | Length  | Adherence <sup>b</sup>                                                 |
|---------------------------|--------------------------------------------------------------------------------------------------------------------|-------------------|-----------------------------------------|-------------------------------------------------|-------------------------------------------|---------|------------------------------------------------------------------------|
|                           | exercises                                                                                                          |                   |                                         |                                                 |                                           |         |                                                                        |
| Phillips et al, 2014 [51] | <i>MoodGYM</i> Interactive Web program, 5 modules, includes exercises, assessments, audio, and a game <sup>i</sup> | CBT               | Website                                 | Non described                                   | No (phone calls as part of research only) | 5 weeks | 28.2% (90/318) considered high users (≥50% of intervention)            |
| Ruwaard et al, 2007 [41]  | 7 weekly modules delivered via email. Feedback given on homework                                                   | CBT               | Email                                   | <i>Tailoring</i> of emails sent to participants | Yes— therapist (feedback on assignments)  | 7 weeks | 72.3% (128/177) received treatment (the extent of this is not defined) |

| Study                     | Intervention description                                                                                               | Type <sup>a</sup>                                 | Primary modality (secondary modalities) | Persuasive tech                                                                           | Guidance                                                  | Length  | Adherence <sup>b</sup>               |
|---------------------------|------------------------------------------------------------------------------------------------------------------------|---------------------------------------------------|-----------------------------------------|-------------------------------------------------------------------------------------------|-----------------------------------------------------------|---------|--------------------------------------|
| Thiart et al, 2015 [48]   | <i>GET.ON Recovery</i> 6 modules with homework. Supported by coaches via email messaging, weekly feedback on exercises | Cognitive behavioral therapy for insomnia (CBT-I) | Website (emails)                        | Tailoring through feedback on homework<br><i>Self-monitoring</i> through a recovery diary | Yes—coach (feedback on exercises and answering questions) | 6 weeks | 95.3% (61/64) completed 6/6 modules  |
| Umanodan et al, 2014 [53] | Computer-based, self-paced stress management training incorporating                                                    | Cognitive behavioral techniques                   | Website (emails)                        | <i>Self-monitoring</i> of skills                                                          | Yes—coordinator (emails sent via the coordinator)         | 7 weeks | 89.4% (127/142) competed all content |

| Study | Intervention description                           | Type <sup>a</sup> | Primary modality (secondary modalities) | Persuasive tech | Guidance | Length | Adherence <sup>b</sup> |
|-------|----------------------------------------------------|-------------------|-----------------------------------------|-----------------|----------|--------|------------------------|
|       | behavioral, communication and cognitive techniques |                   |                                         |                 |          |        |                        |

<sup>a</sup>As described by the authors.

<sup>b</sup>Highest level of intervention completion reported by the authors.

<sup>c</sup>Description taken from website moodgym.anu.edu.au.

### References

41. Ruwaard, J., Lange, A., Bouwman, M., Broeksteeg, J., & Schrieken, B. E - Mailed standardized cognitive behavioural treatment of work - related stress: A randomized controlled trial. *Cognitive Behaviour Therapy* 2007; 36(3), 179–192. PMID: 17852171
43. Birney, A. J., Gunn, R., Russell, J. K., & Ary, D. V. MoodHacker Mobile Web App With Email for Adults to Self-Manage Mild-to-Moderate Depression: Randomized Controlled Trial. *JMIR Mhealth and UHealth* 2016; 4(1), e8. PMID: 26813737

44. Ebert, D. D., Heber, E., Berking, M., Riper, H., Cuijpers, P., Funk, B., & Lehr, D. Self-guided internet-based and mobile-based stress management for employees: results of a randomised controlled trial. *Occupational and Environmental Medicine* 2016; 73(5), 315–323. PMID: 26884049
45. Heber, E., Lehr, D., Ebert, D. D., Berking, M., & Riper, H. Web-Based and Mobile Stress Management Intervention for Employees: A Randomized Controlled Trial. *Journal of Medical Internet Research* 2016; 18(1), e21. PMID: 26818683
46. Ebert, D. D., Lehr, D., Boß, L., Riper, H., Cuijpers, P., Andersson, G., et al. Efficacy of an internet-based problem-solving training for teachers: results of a randomized controlled trial. *Scandinavian Journal of Work, Environment & Health*, 40(6) 2014; PMID: 25121986
47. Ebert, D. D., Berking, M., Thiart, H., Riper, H., Laferton, J. A. C., Cuijpers, P., et al. Restoring depleted resources: Efficacy and mechanisms of change of an internet-based unguided recovery training for better sleep and psychological detachment from work. *Health Psychology* 2015; 34 Suppl, 1240–1251. PMID: 26651465
48. Thiart, H., Lehr, D., Ebert, D. D., Berking, M., & Riper, H. Log in and breathe out: internet-based recovery training for sleepless employees with work-related strain - results of a randomized controlled trial. *Scand J Work Environ Health* 2015; 41(2): 164-74 PMID: 25590336
49. Bolier, L., Ketelaar, S. M., Nieuwenhuijsen, K., Smeets, O., Gärtner, F. R., & Sluiter, J. K. Workplace mental health promotion online to enhance well-being of nurses and allied health professionals: A cluster-randomized controlled trial. *Internet Interventions* 2014; 1(4), 196–204. <http://dx.doi.org/10.1016/j.invent.2014.10.002>

50. Grime, P. R. Computerized cognitive behavioural therapy at work: a randomized controlled trial in employees with recent stress related absenteeism. *Occupational Medicine (Lond)* 2004; 54, 353–359. PMID: 15289593
51. Phillips, R., Schneider, J., Molosankwe, I., Leese, M., Foroushani, P. S., Grime, P., et al. Randomized controlled trial of computerized cognitive behavioural therapy for depressive symptoms: Effectiveness and costs of a workplace intervention. *Psychological Medicine* 2014; 44(4), 741–752. PMID: 23795621
52. Allexandre, D., Bernstein, A. M., Walker, E., Hunter, J., Roizen, M. F., & Morledge, T. J. A Web-Based Mindfulness Stress Management Program in a Corporate Call Center: A Randomized Clinical Trial to Evaluate the Added Benefit of Onsite Group Support. *Journal of Occupational and Environmental Medicine* 2016; 58(3), 254–264. PMID: 26949875
53. Umanodan, R., Shimazu, A., Minami, M., & Kawakami, N. Effects of computer-based stress management training on psychological well-being and work performance in Japanese employees: a cluster randomized controlled trial. *Industrial Health* 2014; 52(6), 480–491. PMID: 25055847
54. Billings, D. W., Cook, R. F., Hendrickson, A., & Dove, D. C. A web-based approach to managing stress and mood disorders in the workforce. *Journal of Occupational and Environmental* 2008; 50(8), 960–968. PMID: 18695455
55. Imamura, K., Kawakami, N., Furukawa, T. A., Matsuyama, Y., Shimazu, A., Umanodan, R., et al. Effects of an Internet-based cognitive behavioral therapy (iCBT) program in Manga format on improving subthreshold depressive symptoms among healthy workers: a randomized controlled trial. *PLoS ONE* 2014; 9(5), e97167. PMID: 24844530

56. Abbott, J.-A., Klein, B., Hamilton, C., & Rosenthal, A. The Impact of Online Resilience Training for Sales Managers on Wellbeing and Work Performance. *Electronic Journal of Applied Psychology* 2009; 5(1), 89–95.
57. Aikens, K. A., Astin, J., Pelletier, K. R., Levanovich, K., Baase, C. M., Park, Y. Y., & Bodnar, C. M. Mindfulness goes to work: Impact of an online workplace intervention. *Journal of Occupational and Environmental Medicine* 2014; 56(7), 721–731. PMID: 24988100
58. Cook, R. F., Billings, D. W., Hersch, R. K., & Back, A. S. A field test of a web-based workplace health promotion program to improve dietary practices, reduce stress, and increase physical activity: randomized controlled trial. *Journal of Medical Internet Research* 2007; 9(2): e17. PMID: 17581811
59. Feicht, T., Wittmann, M., Jose, G., Mock, A., Hirschhausen, von, E., & Esch, T. (2013). Evaluation of a seven-week web-based happiness training to improve psychological well-being, reduce stress, and enhance mindfulness and flourishing: a randomized controlled occupational health study. *Evidence-Based Complementary and Alternative Medicine* 2013; 676953. PMID: 24489588
60. Geraedts, A. S., Kleiboer, A. M., Wiezer, N. M., van Mechelen, W., & Cuijpers, P. Short-term effects of a web-based guided self-help intervention for employees with depressive symptoms: Randomized controlled trial. *Journal of Medical Internet Research* 2014; 16(5), e121. PMID: 24800966
61. Ly, K. H., Asplund, K., & Andersson, G. Stress management for middle managers via an acceptance and commitment-based smartphone application: A randomized controlled trial. *Internet Interventions* 2014; 95-101  
<http://doi.org/10.1016/j.invent.2014.06.003>

62. Beauchamp, N., Irvine, A. B., Seeley, J., & Johnson, B. Worksite based internet multimedia program for family caregivers of persons with dementia. *The Gerontologist* 2005; 45(6), 793–801. PMID: 16326661

*Source*

This is a Multimedia Appendix to a full manuscript published in the J Med Internet Res, for full copyright and citation information see <http://dx.doi.org/10.2196/jmir.7583>
